## Biased evolutionary inferences from bulk tumor samples

*J.M. Alves, T. Prieto, D. Posada\**

Department of Biochemistry, Genetics and Immunology and Biomedical Research Center (CINBIO), University of Vigo, Spain. Galicia Sur Health Research Institute, Vigo, Spain.

\* corresponding author

**Keywords:** Intratumor genetic heterogeneity, somatic evolution, phylogenetic inference, bulk sequencing

1 **ABSTRACT**

2 It is generally agreed that tumors are composed of multiple cell clones defined by  
3 different somatic mutations. Characterizing the evolutionary mechanisms driving  
4 this intratumor genetic heterogeneity (ITH) is crucial to improve both cancer  
5 diagnosis and therapeutic strategies. For that purpose, recent ITH studies have  
6 focused on qualitative comparisons of mutational profiles derived from bulk  
7 sequencing of multiple tumor samples extracted from the same patient. Here, we  
8 show some examples where the naive use of bulk data in multiregional studies  
9 may lead to erroneous inferences of the evolutionary trajectories that underlie  
10 tumor progression, including biased timing of somatic mutations, spurious parallel  
11 mutation events, and/or incorrect chronological ordering of metastatic events. In  
12 addition, we analyze three real datasets to highlight how the use of bulk  
13 mutational profiles instead of inferred clones can lead to different conclusions  
14 about mutational recurrence and population structure.

15

16

17

18

19

20

21

22

23

24

25

26

27

28

29

30

31

32

33

34

## 35 INTRODUCTION

36 Over the past decade, global sequencing efforts of cancer genomes have  
37 revealed that genetic intratumor heterogeneity (ITH) represents a common  
38 feature of many cancer types<sup>1</sup>, arising from the progressive accumulation of  
39 somatic mutations within malignant cells during cancer evolution<sup>2</sup>. As a result,  
40 single tumors typically comprise multiple genetically distinct subpopulations of  
41 cells (i.e., clones), which may vary with regards to growth, metastatic potential,  
42 and therapeutic resistance<sup>2,3</sup>. With the increasingly obvious clinical implications  
43 of ITH<sup>4</sup>, a great deal of attention is currently being directed towards exploring the  
44 complex patterns of clonal heterogeneity under an evolutionary framework, in  
45 order to resolve the genetic history underlying cancer progression<sup>5-7</sup> and gain a  
46 wider understanding of the evolutionary mechanisms driving tumor  
47 diversification<sup>8-11</sup>. Indeed, following the pioneer work by Gerlinger *et al.*<sup>12</sup>,  
48 reporting a high degree of variation in the genetic composition of primary tumors  
49 and metastases as a consequence of divergent clonal evolution, a number of  
50 studies have focused on the spatial and temporal dynamics of tumorigenesis,  
51 taking advantage of next-generation sequencing (NGS) data obtained from bulk  
52 tissue samples extracted from multiple tumor regions within a single patient<sup>10,13-</sup>  
53 <sup>16</sup>.

54  
55 However, although a variety of statistical algorithms exist to infer the clonal  
56 composition of tumors from bulk NGS data (see Beerenwinkel *et al.*<sup>17</sup> for an  
57 exhaustive review), most multiregional sequencing studies still analyze the  
58 spatial patterns of clonal diversity by directly comparing mutational profiles  
59 (absence/presence of mutations) across samples. For example, making use of  
60 whole-exome bulk sequencing data initially derived from 23 evenly distributed  
61 samples in a cross-section of a hepatocellular carcinoma, Ling *et al.*<sup>18</sup> identified  
62 a set of 35 somatic single-nucleotide variants (SNVs) that were subsequently  
63 used to genotype approximately 300 samples of the same tumor. Ancestral  
64 relationships among the sampled regions were inferred from their mutational  
65 profiles, and used to delineate clonal boundaries and reconstruct clonal  
66 genealogies. Consistent with previous findings<sup>10</sup>, the authors observed extensive  
67 genetic diversity between all regional samples, pointing to a limited role of  
68 selection, with patterns of genetic diversity suggesting the appearance of new

69 subclones on the peripheries of tumors which tend to radiate outwards. Similarly,  
70 Zhao *et al.*<sup>19</sup> applied a series of phylogenetic methods to whole-exome  
71 sequencing data derived from 40 cancer patients to address the origin of  
72 metastases. By analyzing the mutational profiles of primary tumors and  
73 associated metastases, the authors concluded that metastatic lineages often  
74 evolved non-linearly from the primary tissue, suggesting that metastases may  
75 originate stochastically from distinct clonal lineages within the primary tumor of a  
76 given patient. In order to trace the timing of such metastatic events, the authors  
77 further transformed the inferred regional trees into patient-specific chronograms,  
78 calibrated a molecular clock based on different clinical parameters, and  
79 suggested that most metastatic lineages appeared to differentiate at very early  
80 stages of cancer progression, usually prior to clinical detection.

81

82 Importantly, at the heart of these studies is the implicit assumption that tumor  
83 clones present in a tissue sample can be meaningfully summarised as the  
84 collection of mutations observed in that sample (i.e., the mutational profile) –or  
85 that only a single or dominant clone exists per sample that carries all mutations–  
86 , and that reliable evolutionary relationships can be inferred from such  
87 information. However, given the high levels of ITH expected in most tumors, this  
88 assumption is not justified and can lead to biased inferences regarding the  
89 evolutionary history of a tumor.

90

91

## 92 **IMPLICATIONS OF MUTATIONAL PROFILES FOR EVOLUTIONARY** 93 **INFERENCE**

94

### 95 *Mutational histories*

96 Since most tumors consist of a genetically heterogeneous population of cells,  
97 mutational profiles of bulk tumor samples essentially reflect the set of somatic  
98 mutations present in a detectable fraction of the cells sampled, but not  
99 immediately the collection of clones present. The fundamental reason for this is  
100 that, in the absence of single-cell information, the precise combination of  
101 mutations that occur in any given clone is unknown, and a set of  $n$  mutations can  
102 represent 1, 2 or even  $n$  clones. In the presence of ITH, multiple clones are

103 expected per bulk sample, hence the observed mutational profile might easily  
104 correspond to a “composite clone” that never existed. Consequently, the use of  
105 mutational profiles as units for evolutionary analysis can have important  
106 implications.

107

108 To illustrate this idea, consider the cancer patient shown in **Fig. 1A**, whose  
109 primary tumor harbors three genetically distinct cell clones A-C resulting from the  
110 accumulation of five somatic mutations. The three clones share some mutations  
111 (“true clonal sequences”) that reflect their common history from a common  
112 ancestor (“true clonal phylogenetic tree”). For simplicity, we assume that the  
113 tumor does not contain healthy cells (i.e., no contamination). **Fig. 1B** depicts a  
114 hypothetical multiregional sequencing study, where three spatially separated  
115 regions from the primary tumor have been sampled and sequenced. While the  
116 sampling scheme shows that all three clones have been captured, the proportion  
117 of each cell clone per sample varies, with sample I consisting entirely of cells  
118 belonging to clone A, sample II being composed of cells from clones B (80%) and  
119 C (20%), and sample III carrying cells from clones A (30%) and C (70%).  
120 Accordingly, only the mutational profile for sample I corresponds to a true clonal  
121 sequence (clone A), while the profiles obtained for the other two samples  
122 represent a composite of clones BC and AC, respectively. If we now build a  
123 maximum parsimony (MP) tree using these composite clones (see Gerlinger *et*  
124 *al.*<sup>12</sup>; Gerlinger *et al.*<sup>14</sup>; Hao *et al.*<sup>16</sup>; Ling *et al.*<sup>18</sup>), we would wrongly infer that  
125 mutations 1, 2 and 3 occurred in the most recent common ancestor (MRCA) of  
126 these samples, and that mutation 5 occurred before mutation 4. Importantly,  
127 these problems can be avoided if one realizes that the history of the samples is  
128 often not the same as the history of the clones. Indeed, in recent years multiple  
129 algorithms have been developed for the identification of clones from bulk tumor  
130 samples<sup>17</sup>, usually by clustering mutations with similar variant allele frequency  
131 (VAF) into single clones. In this example, the clustering algorithm implemented  
132 in Clomial<sup>20</sup> perfectly identifies the true clones. A MP tree of these clonal  
133 sequences accurately recovers the true clonal history and the right order of  
134 mutations (**Fig. 1C, Supplementary Note**).

135

136 **Fig. 2** illustrates another example involving the same hypothetical cancer patient  
137 (**Fig. 2A**), but for which a distinct set of regional samples was obtained (**Fig. 2B**).  
138 In this case, the use of mutational profiles results in a phylogenetic tree in which  
139 mutation 5 spuriously appears to have occurred twice, independently in sample  
140 II and III. Again, the use of a clustering algorithm for clonal identification avoids  
141 this type of bias, leading to the inference of the true tree and the true mutational  
142 history (**Fig. 2C**).

143

144 Furthermore, the fact that different sets of samples obtained from the same  
145 primary tumor can generate two distinct, and incorrect, evolutionary histories  
146 (**Fig. 1B** and **Fig. 2B**) suggests that phylogenetic analysis of mutational profiles  
147 from bulk tumor tissues can be less straightforward than previously thought.

148

#### 149 *Relative timing of metastasis*

150 Another potential issue associated with the use of composite clones is  
151 determining the evolutionary relationships between the primary tumor and distant  
152 metastases. Following a similar approach to Zhao *et al.*<sup>19</sup>, consider now a patient  
153 for which four distinct samples have been sequenced: a primary tumor sample  
154 and three metastases (**Fig. 3A**). For simplicity, we assume that (i) there is no  
155 contamination from healthy cells, (ii) only the primary tumor hosts several clones,  
156 and (iii) somatic mutations accumulate linearly with time (i.e., following a  
157 molecular clock). In this example, there are four true clones (A-D). Clone A  
158 represents the ancestral lineage from which the other clones derived. Clone B,  
159 which was never sampled/existed in the primary tumor, represents the first  
160 metastasis (metastasis I), followed by migration of clone C (metastasis II) and  
161 later of clone D (metastasis III) into three distinct anatomical regions (**Fig. 3B**,  
162 right-panel).

163

164 By assuming that a single clone occurs (or dominates) in each sample, as in Zhao  
165 *et al.*<sup>19</sup>, the primary tumor would be represented by a composite clone that never  
166 existed (**Fig. 3C**, left-panel). In consequence, if we reconstruct a MP tree from  
167 these data we will wrongly infer that metastasis II occurred before metastasis I –  
168 because in this case the lineage leading to metastasis II diverges before the  
169 lineage leading to metastasis I – and that mutations 4 and 5 evolved in parallel in

170 the primary tumor and in metastasis II (**Fig. 3C**, right-panel). Moreover, because  
171 the composite clone for the primary tumor carries all mutations it is tempting to  
172 conclude that it represents the youngest clone (perhaps resulting from a recent  
173 selective sweep) when in fact is the oldest lineage. Conversely, if we use the  
174 observed VAFs to deconvolute the clones present in each sample, despite clone  
175 A not being identified by the clustering algorithm (**Fig. 3D**, left-panel), we will infer  
176 a phylogenetic tree that accurately represents the evolutionary history of this  
177 cancer (**Fig. 3D**, right-panel).

178

179

### 180 *Analysis of real data*

181 Since the examples above represent speculative scenarios, we reanalysed three  
182 multiregional datasets in order to understand whether the use of mutational  
183 profiles *versus* the use of inferred clones can also lead to different conclusions in  
184 real scenarios. In the first study, Hao *et al.*<sup>16</sup> investigated the spatial distribution  
185 of ITH in esophageal squamous cell carcinoma. Using mutational profiles, the  
186 authors reconstructed sample trees for several patients and found multiple cases  
187 where mutations were “incompatible” with the inferred tree. Interestingly, these  
188 are precisely those (parallel) mutations that appear more than once  
189 (**Supplementary Fig.2A**). Conversely, when we inferred the clones present in  
190 the samples and reconstructed their history, all parallel changes disappeared  
191 (**Supplementary Fig.2B**). We argue that in fact the latter scenario seems much  
192 more plausible.

193

194 In another study, Ling *et al.*<sup>18</sup> relied on mutational profiles of 23 regional samples  
195 to investigate the evolutionary dynamics of a hepatocellular carcinoma. Unlike  
196 the original study, in which the spatial diversity patterns suggested seven major  
197 mutational lineages with well-defined spatial boundaries (**Supplementary**  
198 **Fig.3A**), a clonal analysis points instead to the presence of four clonal lineages  
199 segregating at different frequencies across the regional samples with substantial  
200 spatial overlap (**Supplementary Fig.3B**).

201

202 Finally, Gerlinger *et al.*<sup>14</sup> explored the clonal architecture of clear cell renal  
203 carcinoma by analysing the patterns of spatial ITH in multiple patients. Although

204 VAFs were in this case used to predict the clonal composition of each regional  
205 sample, the identification of regional subclones was limited to those samples  
206 showing strong visual evidence of multiple clonal populations (i.e., displaying  
207 clusters of mutations with clearly distinct allele frequency patterns). As a  
208 consequence, the full clonal architecture was not completely resolved, which in  
209 turn may have compromised the derived evolutionary inferences. In case EV007,  
210 for instance, clear signals of intraregional heterogeneity were only observed for  
211 two samples (R3 and R9) and the inferred MP tree suggested five instances of  
212 parallel evolution at the FAM110B, TSKU, TPRG1, NOP2 and BAP1 genes, the  
213 latter being a tumor suppressor gene identified as a putative driver  
214 (**Supplementary Fig.4A**). In contrast, a joint formal analysis of the VAFs of all  
215 regional samples suggests an alternative evolutionary scenario, with three clonal  
216 lineages showing an uneven distribution across the different subsections of the  
217 tumor (**Supplementary Fig.4B**). Notably, the clonal tree implies a single parallel  
218 mutation at the FAM110B gene.

219

## 220 **DISCUSSION**

221 We have shown that the use of absence/presence mutational profiles obtained  
222 from bulk sequencing of tissue samples can compromise the study of tumor  
223 evolution. Given the pervasiveness of ITH, the types of biases we have  
224 demonstrated here - including wrong clonal histories, spurious parallel changes,  
225 reversed timings of metastases and/or incorrect phylogeographic patterns - might  
226 be commonplace suggesting that the interpretation of previous studies might  
227 need to be reevaluated. Furthermore, as already demonstrated by Kostadinov *et*  
228 *al.*<sup>21</sup>, the use of mutational profiles may also result in inaccurate branch length  
229 estimates, leading to an overestimation of substitution rate heterogeneity among  
230 samples that can be confounded with positive selection. Consequently, bulk  
231 mutational profiles need to be interpreted with caution, as without complete  
232 information of the clonal composition of each tumor different evolutionary  
233 scenarios might fit the observed ITH patterns.

234

235 Fortunately, powerful statistical inferential methods are currently being developed  
236 to characterize the clonal composition of bulk tumor samples, which generally  
237 rely on sequencing-depth information and estimates of allele frequencies<sup>20,22-24</sup>.



238 While the relative performance of these methods has not been yet thoroughly  
239 benchmarked, it seems clear from our examples that they could be very helpful  
240 in reducing the level of uncertainty of the evolutionary inference from tumor bulk  
241 samples. In fact, not all multiregional tumor sequencing studies to date have  
242 relied on bulk mutational profiles. A few have already based their evolutionary  
243 inferences on clonal sequences estimated from the data (e.g., Gundem *et al.*<sup>7</sup>;  
244 Yates *et al.*<sup>15</sup>; Ding *et al.*<sup>25</sup>). Alternatively, single-cell sequencing data might soon  
245 become the preferred type of data for the evolutionary analysis of tumors,  
246 provided the technical limitations and the inherent sample bias arising from a  
247 limited number of cells are solved<sup>26–28</sup>.

248

249 Nevertheless, it is clear from our analyses that in multiregional tumor studies it is  
250 important to distinguish “sample trees”, which depict the resemblance among  
251 different regions of the tumor (or among temporal samples), from “clone trees”,  
252 which depict the history of the genetic lineages inhabiting the tumor. In  
253 evolutionary biology, these type of trees are analogous to “population/species  
254 trees” and “gene trees”, respectively (e.g., Tajima<sup>29</sup>, Pamilo & Nei<sup>30</sup>; Page &  
255 Charleston<sup>31</sup> for a review). Gene trees are embedded inside population trees in  
256 the same way as clonal lineages evolve along different tumor regions, although  
257 tumor samples should be much more admixed than organismal population  
258 samples.

259

260 Outside cancer genomics, potential biases resulting from the evolutionary  
261 analysis of pooled individuals (“pool-sequencing”) have been already identified  
262 and several corrections have been proposed for the estimation of allele  
263 frequencies, diversity indices, SNP calling, population structure, tests of  
264 neutrality or association tests from pool-seq data<sup>32</sup>. Some of these corrections  
265 might be applicable in the cancer scenario.

266

267 In the future, complementary strategies combining clonal estimates derived from  
268 bulk-sequencing data with single-cell information should provide a more precise  
269 view of the clonal architecture of tumors, which could ultimately be used to  
270 improve cancer prognosis and therapy.

271

## 272 **ACKNOWLEDGMENTS**

273 We would like to thank Andrés Pérez-Figueroa, Inigo Martincorena, Harald  
274 Detering and Sara Rocha for their comments on earlier versions of the  
275 manuscript. This work was supported by the European Research Council (ERC-  
276 617457- PHYLOCANCER awarded to D.P.) and by the Ministry of Economy and  
277 Competitiveness - MINECO (BFU2015-63774-P awarded to D.P.). T.P. was  
278 supported by a PhD fellowship from the Galician Government (ED481A-  
279 2015/083) and a PhD fellowship from the Spanish Government (FPU15/03709).

280

## 281 **AUTHOR CONTRIBUTIONS**

282 D.P. conceived the project and designed the analyses. D.P., J.M.A. and T.P.  
283 performed the analyses. J.M.A. and D.P. wrote the manuscript.

284

## 285 **COMPETING FINANCIAL INTEREST**

286 The authors declare no competing financial interests.

287

## 288 **MATERIALS & CORRESPONDENCE:**

289 David Posada ([dposada@uvigo.es](mailto:dposada@uvigo.es))

290 Phylogenomics Lab, Edificio Torre CACTI, Campus Universitario, Universidad de  
291 Vigo 36310 Vigo, Spain. (+34) 986 130050

292

293

## 294 **REFERENCES**

- 295 1. Burrell, R. A., McGranahan, N., Bartek, J. & Swanton, C. The causes and  
296 consequences of genetic heterogeneity in cancer evolution. *Nature* **501**, 338–345  
297 (2013).
- 298 2. Greaves, M., Mel, G. & Maley, C. C. Clonal evolution in cancer. *Nature* **481**, 306–  
299 313 (2012).
- 300 3. Aparicio, S. & Caldas, C. The implications of clonal genome evolution for cancer  
301 medicine. *N. Engl. J. Med.* **368**, 842–851 (2013).

- 302 4. Andor, N. *et al.* Pan-cancer analysis of the extent and consequences of intratumor  
303 heterogeneity. *Nat. Med.* **22**, 105–113 (2016).
- 304 5. Nik-Zainal, S. *et al.* The life history of 21 breast cancers. *Cell* **149**, 994–1007  
305 (2012).
- 306 6. Jiao, W., Vembu, S., Deshwar, A. G., Stein, L. & Morris, Q. Inferring clonal  
307 evolution of tumors from single nucleotide somatic mutations. *BMC Bioinformatics*  
308 **15**, 35 (2014).
- 309 7. Gundem, G. *et al.* The evolutionary history of lethal metastatic prostate cancer.  
310 *Nature* **520**, 353–357 (2015).
- 311 8. Stephens, P. J. *et al.* The landscape of cancer genes and mutational processes in  
312 breast cancer. *Nature* **486**, 400–404 (2012).
- 313 9. Nik-Zainal, S. *et al.* Mutational processes molding the genomes of 21 breast  
314 cancers. *Cell* **149**, 979–993 (2012).
- 315 10. Sottoriva, A. *et al.* A Big Bang model of human colorectal tumor growth. *Nat.*  
316 *Genet.* **47**, 209–216 (2015).
- 317 11. Williams, M. J., Benjamin, W., Barnes, C. P., Graham, T. A. & Andrea, S.  
318 Identification of neutral tumor evolution across cancer types. *Nat. Genet.* **48**, 238–  
319 244 (2016).
- 320 12. Gerlinger, M. *et al.* Intratumor Heterogeneity and Branched Evolution Revealed by  
321 Multiregion Sequencing. *N. Engl. J. Med.* **366**, 883–892 (2012).
- 322 13. Zhang, J. *et al.* Intratumor heterogeneity in localized lung adenocarcinomas  
323 delineated by multiregion sequencing. *Science* **346**, 256–259 (2014).
- 324 14. Gerlinger, M. *et al.* Genomic architecture and evolution of clear cell renal cell  
325 carcinomas defined by multiregion sequencing. *Nat. Genet.* **46**, 225–233 (2014).
- 326 15. Yates, L. R. *et al.* Subclonal diversification of primary breast cancer revealed by  
327 multiregion sequencing. *Nat. Med.* **21**, 751–759 (2015).
- 328 16. Hao, J.-J. *et al.* Spatial intratumoral heterogeneity and temporal clonal evolution in  
329 esophageal squamous cell carcinoma. *Nat. Genet.* (2016). doi:10.1038/ng.3683

- 330 17. Beerenwinkel, N., Schwarz, R. F., Gerstung, M. & Markowetz, F. Cancer evolution:  
331 mathematical models and computational inference. *Syst. Biol.* **64**, e1–25 (2015).
- 332 18. Ling, S. *et al.* Extremely high genetic diversity in a single tumor points to  
333 prevalence of non-Darwinian cell evolution. *Proceedings of the National Academy*  
334 *of Sciences* **112**, E6496–E6505 (2015).
- 335 19. Zhao, Z.-M. *et al.* Early and multiple origins of metastatic lineages within primary  
336 tumors. *Proceedings of the National Academy of Sciences* **113**, 2140–2145  
337 (2016).
- 338 20. Zare, H. *et al.* Inferring clonal composition from multiple sections of a breast  
339 cancer. *PLoS Comput. Biol.* **10**, e1003703 (2014).
- 340 21. Kostadinov, R., Maley, C. C. & Kuhner, M. K. Bulk Genotyping of Biopsies Can  
341 Create Spurious Evidence for Heterogeneity in Mutation Content. *PLoS Comput.*  
342 *Biol.* **12**, e1004413 (2016).
- 343 22. Fischer, A., Vázquez-García, I., Illingworth, C. J. R. & Mustonen, V. High-definition  
344 reconstruction of clonal composition in cancer. *Cell Rep.* **7**, 1740–1752 (2014).
- 345 23. Oesper, L., Mahmoody, A. & Raphael, B. J. THetA: inferring intra-tumor  
346 heterogeneity from high-throughput DNA sequencing data. *Genome Biol.* **14**, R80  
347 (2013).
- 348 24. Popic, V. *et al.* Fast and scalable inference of multi-sample cancer lineages.  
349 *Genome Biol.* **16**, 91 (2015).
- 350 25. Ding, L. *et al.* Clonal evolution in relapsed acute myeloid leukaemia revealed by  
351 whole-genome sequencing. *Nature* **481**, 506–510 (2012).
- 352 26. Gawad, C., Koh, W. & Quake, S. R. Single-cell genome sequencing: current state  
353 of the science. *Nat. Rev. Genet.* **17**, 175–188 (2016).
- 354 27. Navin, N. E. Cancer genomics: one cell at a time. *Genome Biol.* **15**, (2014).
- 355 28. Navin, N. E. The first five years of single-cell cancer genomics and beyond.  
356 *Genome Res.* **25**, 1499–1507 (2015).

- 357 29. Tajima, F. Evolutionary relationship of DNA sequences in finite populations.  
358 *Genetics* **105**, 437–460 (1983).
- 359 30. Pamilo, P. & Nei, M. Relationships between gene trees and species trees. *Mol.*  
360 *Biol. Evol.* **5**, 568–583 (1988).
- 361 31. Page, R. D. & Charleston, M. A. Trees within trees: phylogeny and historical  
362 associations. *Trends Ecol. Evol.* **13**, 356–359 (1998).
- 363 32. Schlötterer, C., Tobler, R., Kofler, R. & Nolte, V. Sequencing pools of individuals -  
364 mining genome-wide polymorphism data without big funding. *Nat. Rev. Genet.* **15**,  
365 749–763 (2014).

366

367

368

369

370

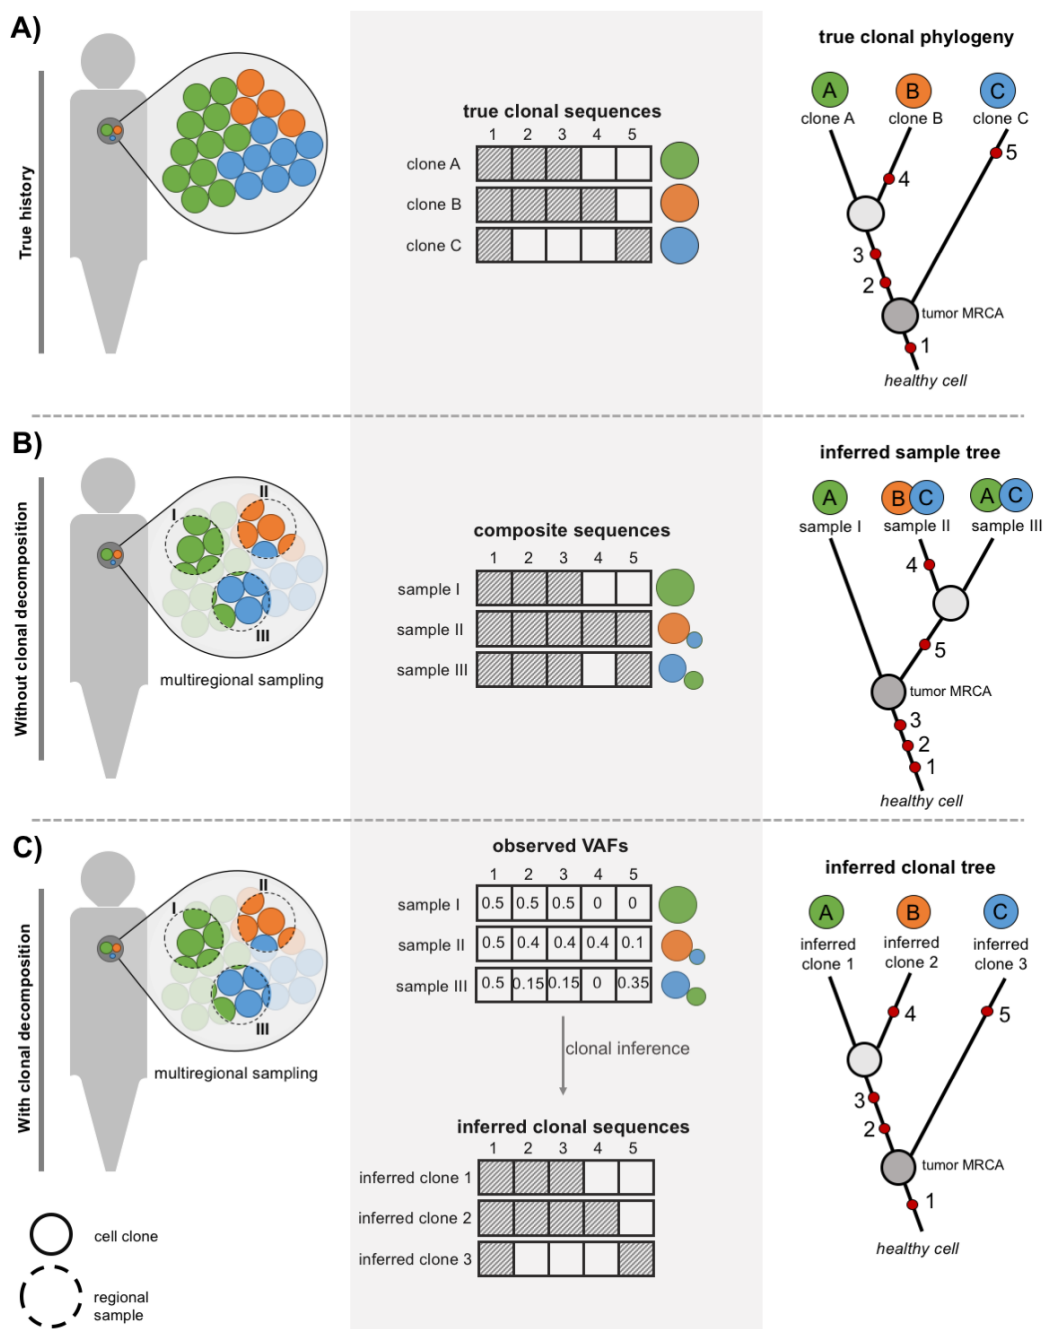

371

372

373

374

375

376

377

378

379

380

381

382

383

**Figure 1. Phylogenetic analysis of bulk tumor samples (I).** **A) Left-panel:** clonal composition of a hypothetical primary tumor. Colored circles represent the three clones present (A-C). **Mid-panel:** true clonal sequences for five different genomic sites, where the dashed square indicates a somatic mutation. **Right-panel:** true clonal history with red dots depicting the chronological order of mutations. Tumor most recent common ancestor (MRCA) highlighted as an internal node. **B) Left-panel:** bulk regional samples (I-III), with intermixed clones at different proportions. **Mid-panel:** composite sequences (presence/absence) inferred, dashed square indicates presence of mutation. **Right-panel:** inferred sample history using maximum parsimony. Red dots depict the inferred chronological order of mutations. **C) Left-panel:** bulk regional samples (I-III), with intermixed clones at different proportions. **Mid-panel:** variant allele frequency estimates for mutation at each sample, and inferred clonal sequences using the Clomial algorithm (see supplementary note for details). **Right-panel:** inferred clonal history using maximum parsimony. Red dots depict the inferred chronological order of mutations.

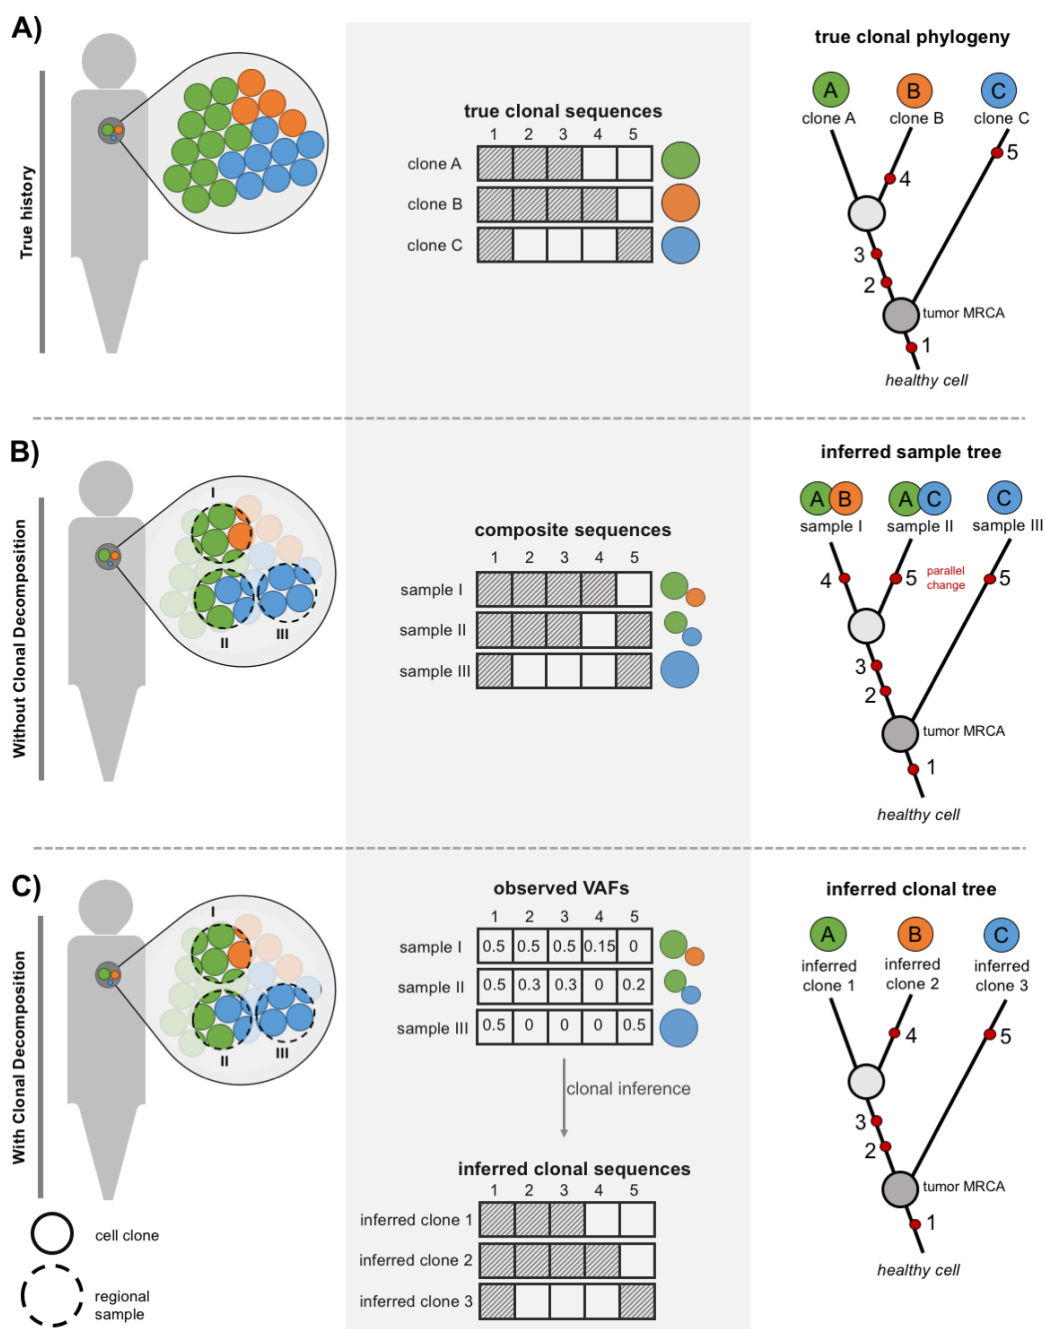

384

385 **Figure 2. Phylogenetic analysis of bulk tumor samples (II).** **A) Left-panel:** clonal composition of a  
 386 hypothetical primary tumor. Colored circles represent the three clones present (A-C). **Mid-panel:** true clonal  
 387 sequences for five different genomic sites, where the dashed square indicates a somatic mutation. **Right-**  
 388 **panel:** true clonal history with red dots depicting the chronological order of mutations. Tumor most recent  
 389 common ancestor (MRCA) highlighted as an internal node. **B) Left-panel:** bulk regional samples (I-III), with  
 390 intermixed clones at different proportions. **Mid-panel:** composite sequences (presence/absence) inferred,  
 391 dashed square indicates presence of mutation. **Right-panel:** inferred sample history using maximum  
 392 parsimony. Red dots depicting the chronological order of mutations. **C) Left-panel:** bulk regional samples (I-  
 393 III), with intermixed clones at different proportions. **Mid-panel:** variant allele frequency estimates for mutation  
 394 at each sample, and inferred clonal sequences using the Clomial algorithm (but see supplementary note).  
 395 **Right-panel:** inferred clonal history using maximum parsimony. Red dots depicting the chronological order  
 396 of mutations.

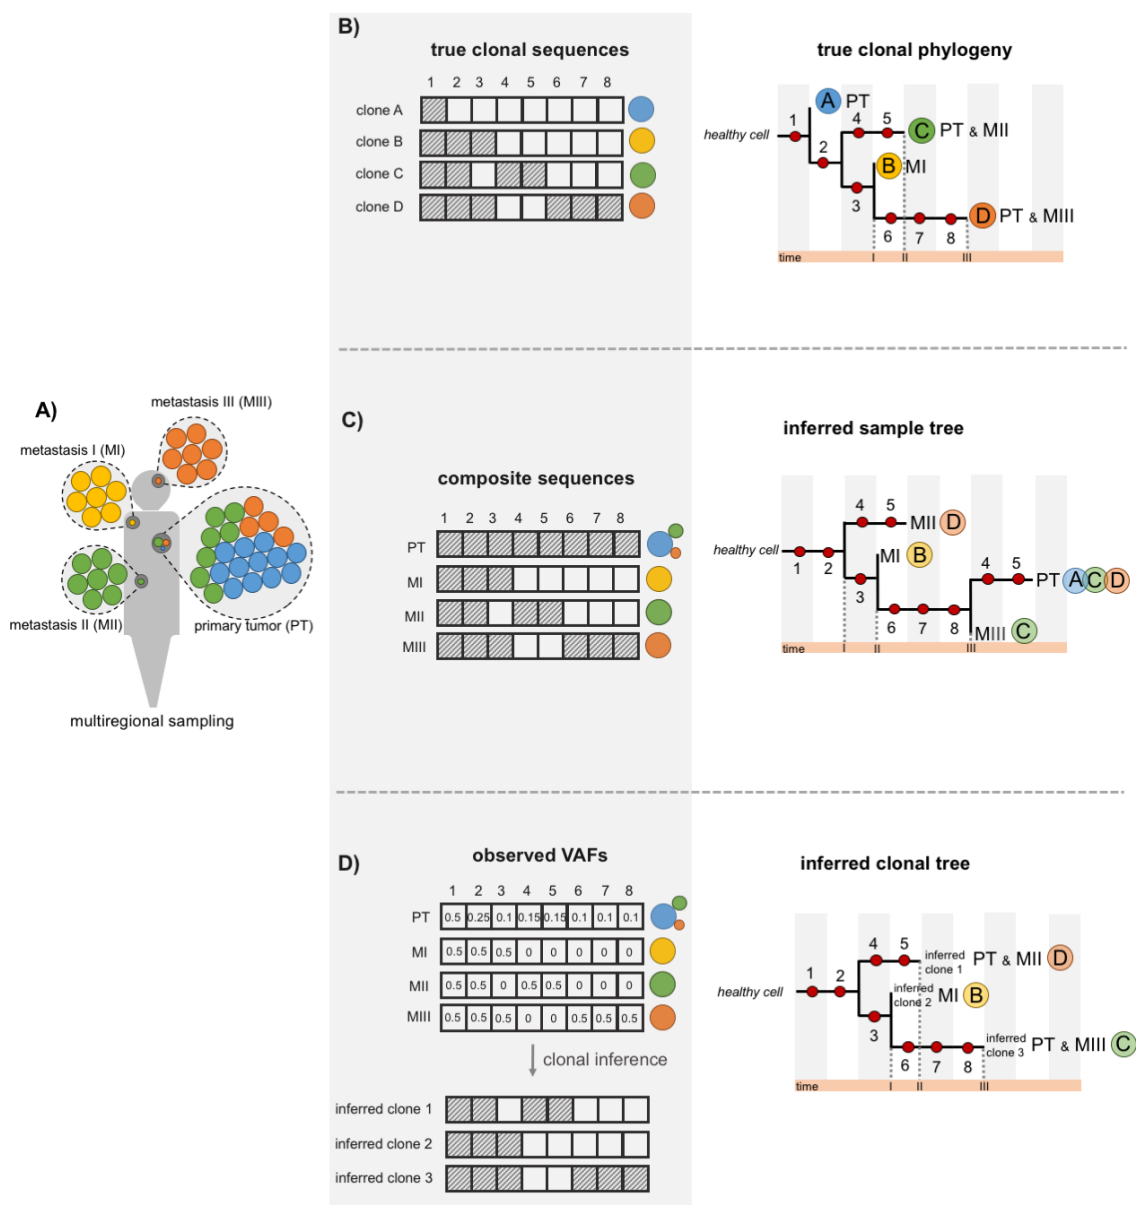

397

398 **Figure 3. Incorrect chronological ordering of metastatic events using composite**  
 399 **sequences.** **A)** Sampling scheme of geographically distinct tumor samples: one primary tumor  
 400 and three metastatic sites. Colored circles represent the four cellular clones present (i.e., A, B, C  
 401 and D). **B) Left-panel:** Clonal sequences based on genotype information from 8 somatic mutations  
 402 - dashed square indicates presence of mutation. **Right-panel:** True clonal phylogenetic tree and  
 403 geographical location of each clone. Chronological order of metastatic events depicted in the  
 404 orange bar below the tree. **C) Left-panel:** Derived regional genotype sequences using  
 405 presence/absence states. **Right-panel:** Inferred sample tree using maximum likelihood or  
 406 maximum parsimony for the composite sequences. Inferred chronological order of metastatic  
 407 events depicted in the orange bar below the regional tree. **D) Left-panel:** Allele frequency  
 408 estimates of each mutation per regional sample, and inferred clonal sequences using Clomial  
 409 algorithm (but see supplementary note). **Right-panel:** Phylogenetic tree drawn from the inferred  
 410 clones (ICs) and inferred geographical location of each clone. Inferred chronological order of  
 411 metastatic events depicted in the orange bar below the clonal tree.
